# Supplementary material for: Tropism Analysis of Two Coxsackie B5 Strains Reveals Virus Growth in Human Primary Pancreatic Islets but not in Exocrine Cell Clusters In Vitro
Source: PubMed Central journal article supplement — Open Virol J. 2013 Apr 5;7:49–56. doi: 10.2174/1874357901307010049 (PMC3657700; doi:10.2174/1874357901307010049), 2013-04-05
Supplement: TOVJ-7-49-SD1.pdf [file TOVJ-7-49-SD1.pdf]

## SUPPLEMENTARY MATERIAL

### Tropism Analysis of Two Coxsackie B5 Strains Reveals Virus Growth in Human Primary Pancreatic Islets But Not Exocrine Cell Clusters *In Vitro*

M. Hodik, A. Lukinius, O. Korsgren, G. Frisk

Department of Immunology, Genetics and Pathology, Rudbeck laboratory, Uppsala University, Uppsala, Sweden

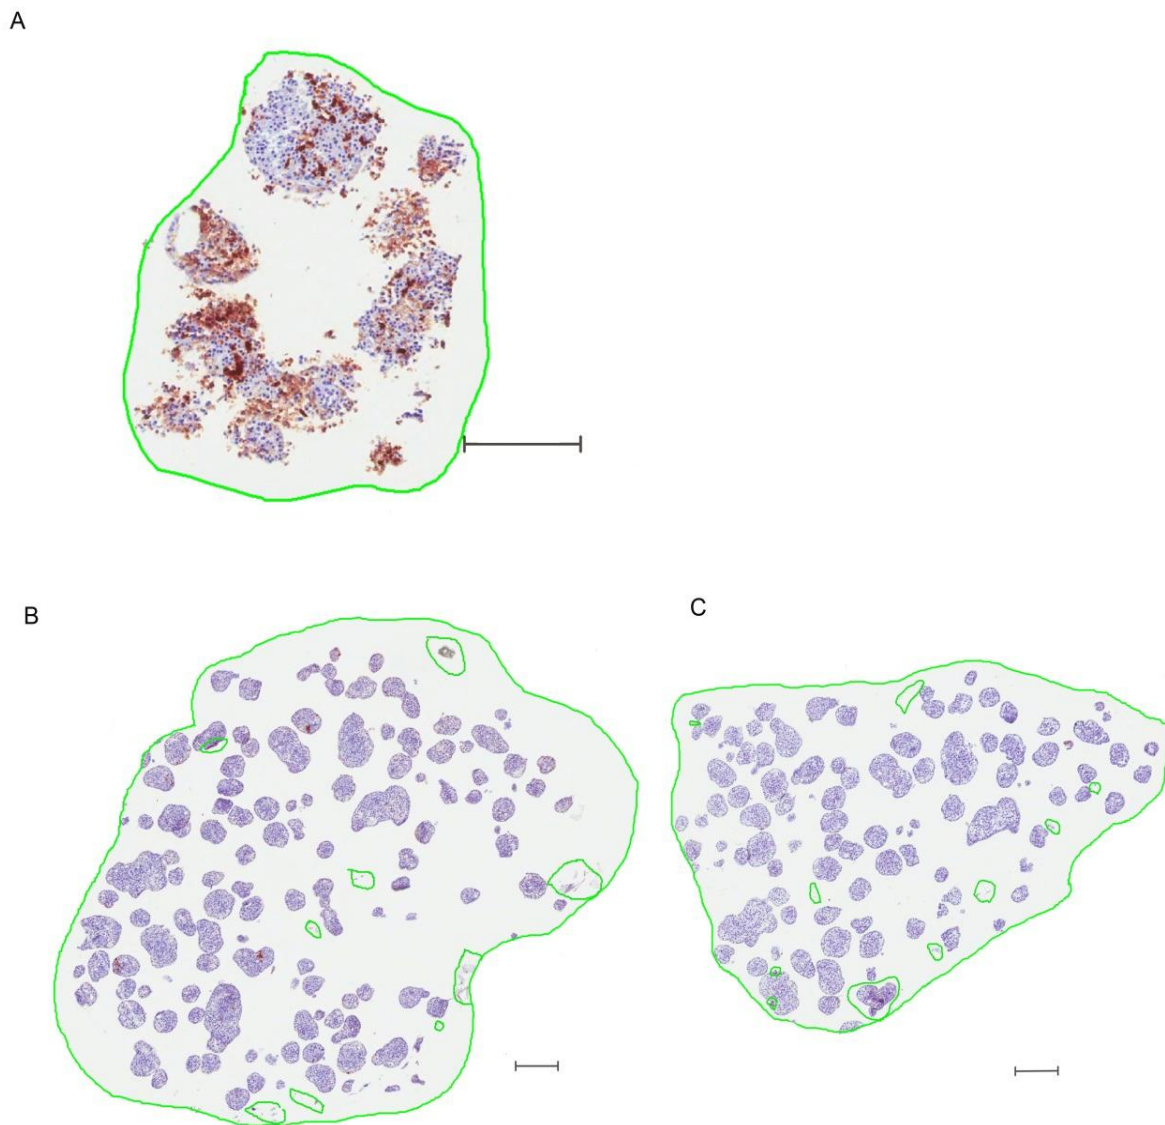

**Supplemented Fig. (1).** HEVP1 could be observed in the pancreatic endocrine cell cluster fractions inoculated with (A) CVB-1-11. Serial sections of exocrine cell cluster fraction inoculated with CVB1-11 and labeled for (C) chromogranin A and (D) HEVP1 show lack of virus. Bars correspond to 200 μm.
